# Supplementary material for: H3K4 methylation at active genes mitigates transcription-replication conflicts during replication stress
Source: PubMed Central journal article supplement (PMC7010754; doi:10.1038/s41467-020-14595-4), 2020-02-10
Supplement: 41467_2020_14595_MOESM1_ESM.pdf [file 41467_2020_14595_MOESM1_ESM.pdf]

# Supplementary Information

H3K4 methylation at active genes  
mitigates transcription-replication  
conflicts during replication stress

By Chong *et al.*

# Supplementary Figure 1

a

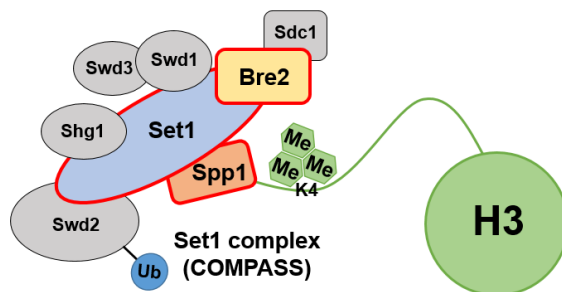

b

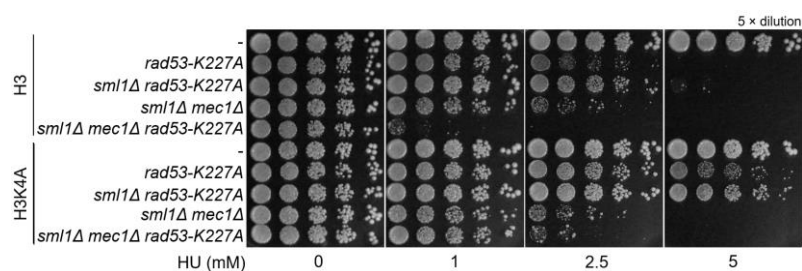

c

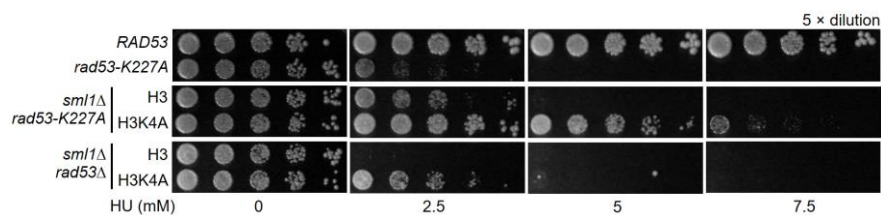

d

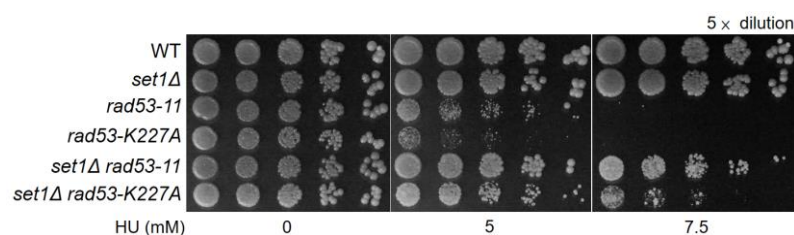

**Supplementary Figure 1. *rad53* HU sensitivity is negatively correlated with H3K4 methylation levels and independent of Mec1 signaling.**

**a** Schematic representation of the Set1 Complex. HU sensitivity was determined with **b** WT (*MEC1 RAD53*), *sml1Δ mec1Δ*, *rad53-K227A* and *sml1Δ mec1Δ rad53-K227A* backgrounds; **c** *sml1Δ rad53Δ* and *sml1Δ rad53-K227A* with either H3 or H3K4A mutation; **d** *set1Δ* and kinase-dead *rad53* mutant with mutation of K227A or G653E (*rad53-11*).

## Supplementary Figure 2

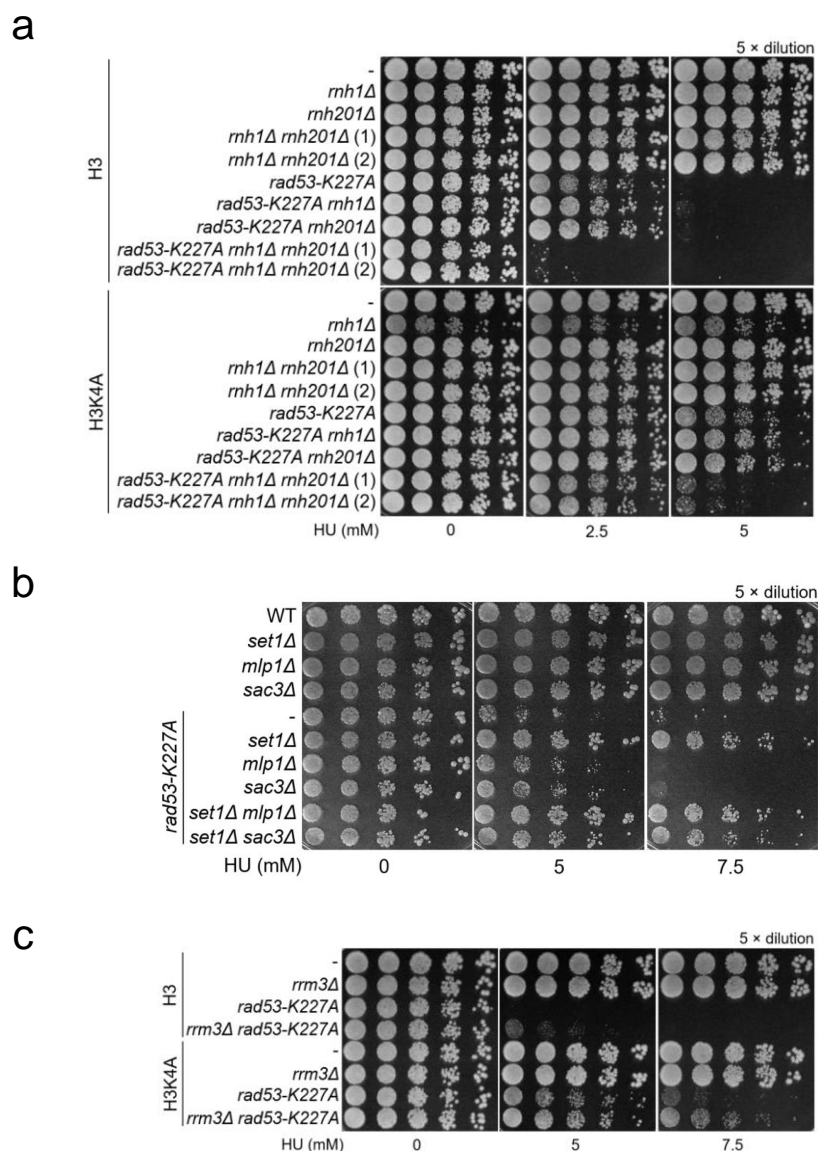

**Supplementary Figure 2. The interaction between ablation of H3K4 methylation and *rad53* mutation is independent of the R-loop and known *rad53* HU-sensitivity suppressors.**

**a-c** HU sensitivity was determined with **a**, RNase H mutation(s); **b** gene gating gene mutation and **c** Rad53-suppressed helicase mutation in *RAD53* and *rad53-K227A* backgrounds with normal (H3) or ablated (H3K4A or with *set1Δ*) H3K4 methylation.

# Supplementary Figure 3

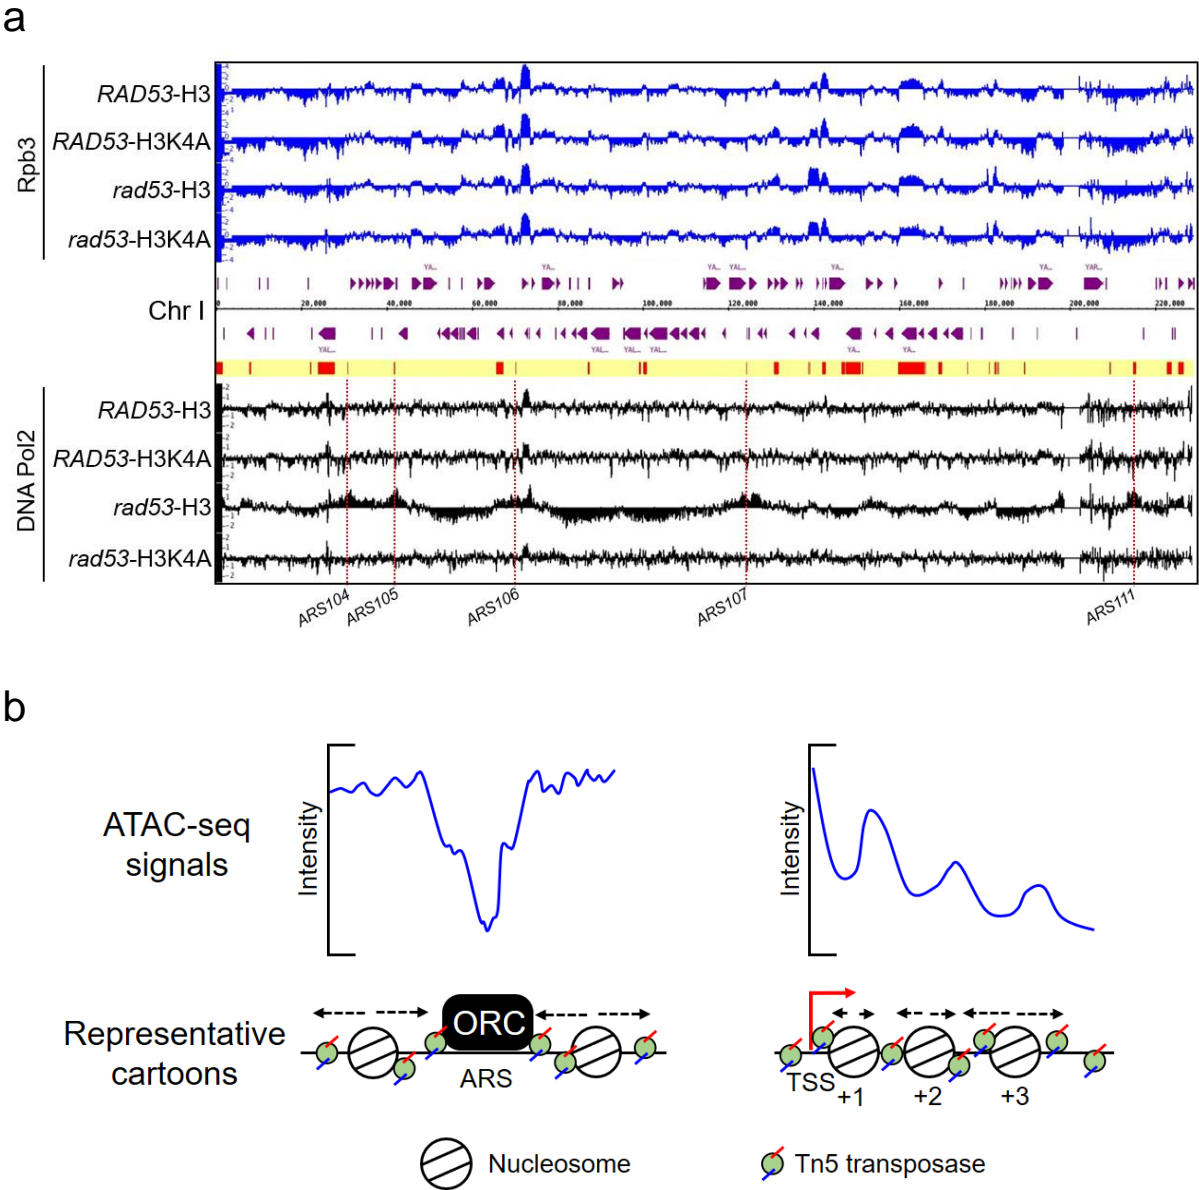

**Supplementary Figure 3. The restored-replication progression of *rad53* mutants in HU by losing H3K4me is unconcerned with alterations in chromatin structure.**

**a** Rbp3 and DNA Pol2 ChIP-seq tracks of *RAD53*-H3, *RAD53*-H3K4A, *rad53*-H3 and *rad53*-H3K4A strains on chromosome I (Chr I). *rad53* refers to *rad53*-K227A mutant. Red dashed lines indicate ARSs with stalled DNA Pol2 in *rad53* cells. **b** Representative cartoons to illustrate ATAC-seq signal found on ORC-bound origins and TSS regions; with longer arrows on nucleosomes representing nucleosomes that are less consistently positioned.

## Supplementary Figure 4

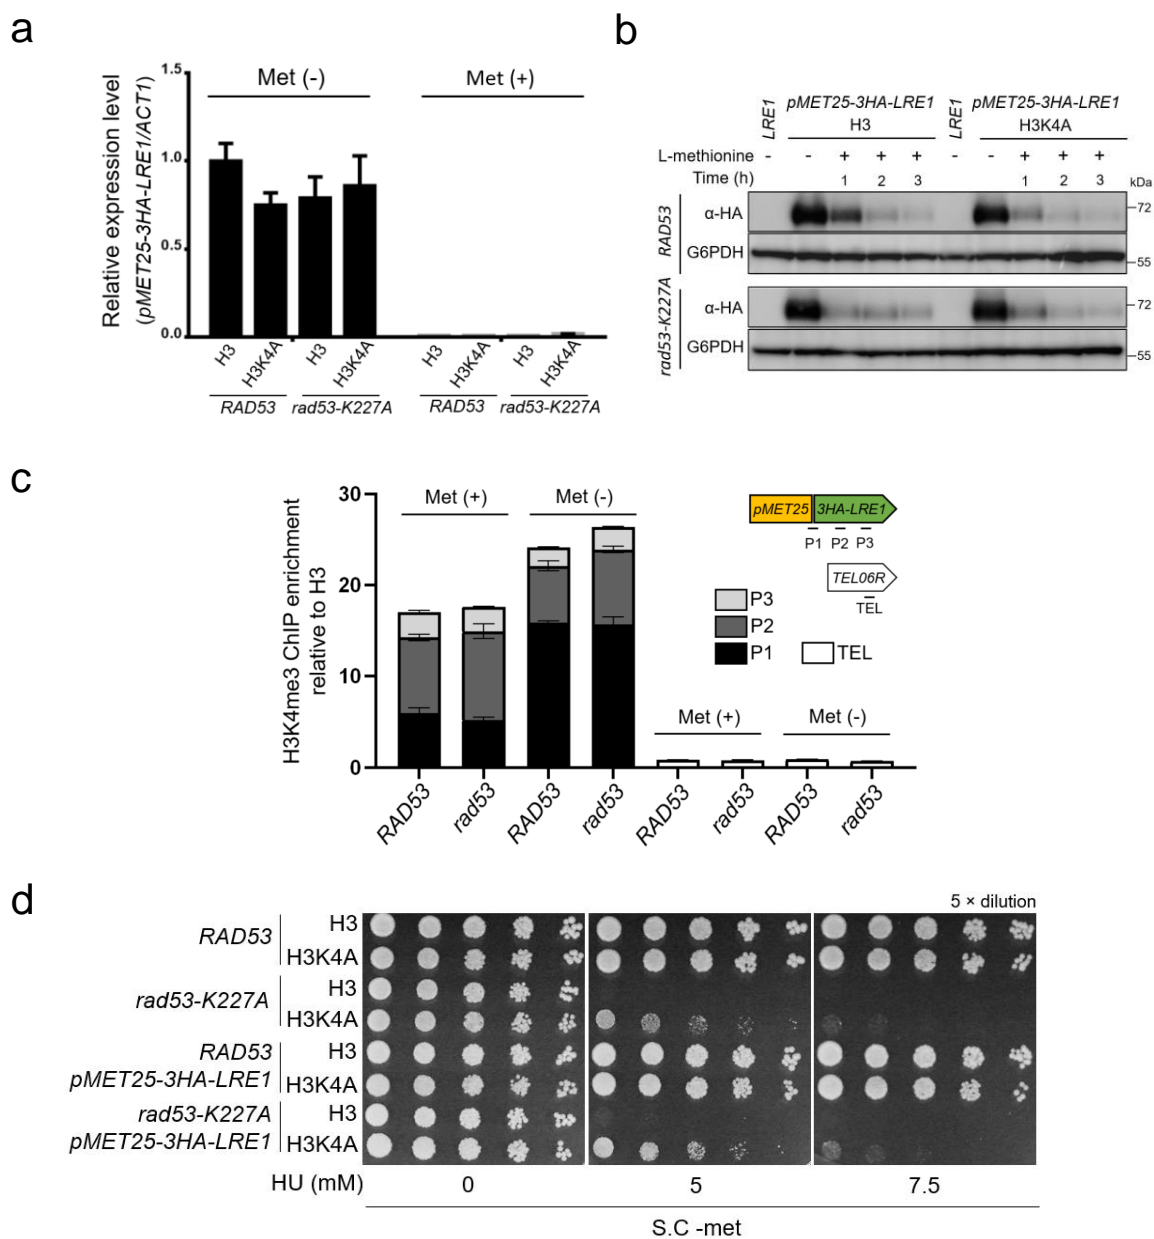

### Supplementary Figure 4. Evaluation of the *pMET25-3HA-LRE1-ARS305* TRC system.

**a** The gene expression levels of *pMET25-3HA-LRE1* of *RAD53* and *rad53-K227A* cells with either normal H3 or H3K4A mutation after incubation in S.C.-met medium (Met (-), activation) or S.C. medium (Met (+), suppression) **b** Protein levels resulting from activated and suppressed *pMET25-3HA-LRE1* gene in strains similar to **a**, cells were initially cultured in S.C.-met medium with addition of L-methionine (0.005%, w/v) into medium for the indicated time. **c** H3K4me3 deposition on *pMET25-3HA-LRE1* on indication regions under suppressed (met+) and activated (met-) conditions **d** Induction of additional HO-oriented TRCs between *pMET25-3HA-LRE1* transcription and replication fork from *ARS305* do not affect cell survival upon HU treatment. Error bars represent  $\pm$  SEM ( $n = 3$  technical replicates).

Supplementary Table 1: Strains used in this study

| Strains                      | Number  | Genotype                                                                                                                                                            | Reference/source                                             |
|------------------------------|---------|---------------------------------------------------------------------------------------------------------------------------------------------------------------------|--------------------------------------------------------------|
| MSY421 (wild-type)           | CSY0016 | <i>MATa ura3-52 leu2-3,112 trp1 his3 Δ[HHT1-HHF1] Δ[HHT2-HHF2] pMS329-copy I [URA3, HHT1-HHF1]</i>                                                                  | David Allis's lab <sup>1</sup>                               |
| <i>RAD53</i> -H3             | CSY0019 | <i>MATa ura3-52 leu2-3,112 trp1 his3 Δ[HHT1-HHF1] Δ[HHT2-HHF2] pMS337 [CEN4 ARS1 LEU2 HHT1-HHF1]</i>                                                                | This study (Fig. 1a, S1b-c, 7a, S2a)                         |
| <i>RAD53</i> -H3K4A          | CSY0020 | <i>MATa ura3-52 leu2-3,112 trp1 his3 Δ[HHT1-HHF1] Δ[HHT2-HHF2] pMS337 [CEN4 ARS1 LEU2 hht1-H3K4A-HHF1]</i>                                                          | This study (Fig. 1a, 7a, S1b, S2a)                           |
| <i>RAD53</i> -H3R2A          | CSY0024 | <i>MATa ura3-52 leu2-3,112 trp1 his3 Δ[HHT1-HHF1] Δ[HHT2-HHF2] pMS337 [CEN4 ARS1 LEU2 hht1-H3R2A-HHF1]</i>                                                          | This study (Fig. 1a, 7a)                                     |
| <i>RAD53</i> -H3K36A         | CSY0022 | <i>MATa ura3-52 leu2-3,112 trp1 his3 Δ[HHT1-HHF1] Δ[HHT2-HHF2] pMS337 [CEN4 ARS1 LEU2 hht1-H3K36A-HHF1]</i>                                                         | This study (Fig. 1a, 7a)                                     |
| <i>RAD53</i> -H3K79A         | CSY0023 | <i>MATa ura3-52 leu2-3,112 trp1 his3 Δ[HHT1-HHF1] Δ[HHT2-HHF2] pMS337 [CEN4 ARS1 LEU2 hht1-H3K79A-HHF1]</i>                                                         | This study (Fig. 1a, 7a)                                     |
| <i>rad53-K227A</i> -H3       | CSY0025 | <i>MATa ura3-52 leu2-3,112 trp1 his3 Δ[HHT1-HHF1] Δ[HHT2-HHF2] natNT2-rad53-K227A pMS337 [CEN4 ARS1 LEU2 HHT1-HHF1]</i>                                             | This study (Fig. 1a, S1b-c, S2A)                             |
| <i>rad53-K227A</i> -H3K4A    | CSY0026 | <i>MATa ura3-52 leu2-3,112 trp1 his3 Δ[HHT1-HHF1] Δ[HHT2-HHF2] natNT2-rad53-K227A pMS337 [CEN4 ARS1 LEU2 HHT1-H3K4A-HHF1]</i>                                       | This study (Fig. 1a, S1b, S2a)                               |
| <i>rad53-K227A</i> -H3R2A    | CSY0030 | <i>MATa ura3-52 leu2-3,112 trp1 his3 Δ[HHT1-HHF1] Δ[HHT2-HHF2] natNT2-rad53-K227A pMS337 [CEN4 ARS1 LEU2 HHT1-H3R2A-HHF1]</i>                                       | This study (Fig. 1a)                                         |
| <i>rad53-K227A</i> -H3K36A   | CSY0028 | <i>MATa ura3-52 leu2-3,112 trp1 his3 Δ[HHT1-HHF1] Δ[HHT2-HHF2] natNT2-rad53-K227A pMS337 [CEN4 ARS1 LEU2 HHT1-H3K36A-HHF1]</i>                                      | This study (Fig. 1a)                                         |
| <i>rad53-K227A</i> -H3K79A   | CSY0029 | <i>MATa ura3-52 leu2-3,112 trp1 his3 Δ[HHT1-HHF1] Δ[HHT2-HHF2] natNT2-rad53-K227A pMS337 [CEN4 ARS1 LEU2 HHT1-H3K79A-HHF1]</i>                                      | This study (Fig. 1a)                                         |
| H3                           | CSY0252 | <i>MATa ura3-52 leu2-3,112 trp1 his3 Δ[HHT1-HHF1] Δ[HHT2-HHF2] bar1::HIS3 natNT2-pMET25-3HA-LRE1 pMS337 [CEN4 ARS1 LEU2 HHT1-HHF1]</i>                              | This study (Fig. 1b-d, 4e, 5b-c, 6b-c, 7c-d, 7f, S2c, S4a-d) |
| <i>rad53-K227A</i> -H3       | CSY0186 | <i>MATa ura3-52 leu2-3,112 trp1 his3 Δ[HHT1-HHF1] Δ[HHT2-HHF2] kanMX4-rad53-K227A bar1::HIS3 natNT2-pMET25-3HA-LRE1 pMS337 [CEN4 ARS1 LEU2 HHT1-HHF1]</i>           | This study (Fig. 1b-e, 3a, 4h, 5b-c, S2c, S4a, S4c-d)        |
| <i>rad53-K227A set1Δ</i> -H3 | CSY0302 | <i>MATa ura3-52 leu2-3,112 trp1 his3 Δ[HHT1-HHF1] Δ[HHT2-HHF2] kanMX4-rad53-K227A bar1::HIS3 natNT2-pMET25-3HA-LRE1 set1::HPH pMS337 [CEN4 ARS1 LEU2 HHT1-HHF1]</i> | This study (Fig. 1b-e, 3a, 4h)                               |
| <i>rad53-K227A bre2Δ</i> -H3 | CSY0303 | <i>MATa ura3-52 leu2-3,112 trp1 his3 Δ[HHT1-HHF1] Δ[HHT2-HHF2] kanMX4-rad53-K227A bar1::HIS3 natNT2-pMET25-3HA-LRE1 bre2::HPH pMS337 [CEN4 ARS1 LEU2 HHT1-HHF1]</i> | This study (Fig. 1b-e, 3a, 4h)                               |
| <i>rad53-K227A spp1Δ</i> -H3 | CSY0304 | <i>MATa ura3-52 leu2-3,112 trp1 his3 Δ[HHT1-HHF1] Δ[HHT2-HHF2] kanMX4-rad53-K227A bar1::HIS3 natNT2-pMET25-3HA-LRE1 spp1::HPH pMS337 [CEN4 ARS1 LEU2 HHT1-HHF1]</i> | This study (Fig. 1b-e, 3a, 4h)                               |
| <i>set1Δ</i> -H3             | CSY0299 | <i>MATa ura3-52 leu2-3,112 trp1 his3 Δ[HHT1-HHF1] Δ[HHT2-HHF2] bar1::HIS3 natNT2-pMET25-3HA-LRE1 set1::HPH pMS337 [CEN4 ARS1 LEU2 HHT1-HHF1]</i>                    | This study (Fig. 1c, 5c, 7a)                                 |
| <i>bre2Δ</i> -H3             | CSY0300 | <i>MATa ura3-52 leu2-3,112 trp1 his3 Δ[HHT1-HHF1] Δ[HHT2-HHF2] bar1::HIS3 natNT2-pMET25-3HA-LRE1 bre2::HPH pMS337 [CEN4 ARS1 LEU2 HHT1-HHF1]</i>                    | This study (Fig. 1c, 7a)                                     |

|                                              |         |                                                                                                                                                                 |                                                               |
|----------------------------------------------|---------|-----------------------------------------------------------------------------------------------------------------------------------------------------------------|---------------------------------------------------------------|
| <i>spp1Δ</i> -H3                             | CSY0301 | <i>MATa ura3-52 leu2-3,112 trp1 his3 Δ[HHT1-HHF1] Δ[HHT2-HHF2] bar1::HIS3 natNT2-pMET25-3HA-LRE1 spp1::HPH pMS337 [CEN4 ARS1 LEU2 HHT1-HHF1]</i>                | This study (Fig. 1c, 7a)                                      |
| H3K4A                                        | CSY0253 | <i>MATa ura3-52 leu2-3,112 trp1 his3 Δ[HHT1-HHF1] Δ[HHT2-HHF2] bar1::HIS3 natNT2-pMET25-3HA-LRE1 pMS337 [CEN4 ARS1 LEU2 HHT1-HHF1]</i>                          | This study (Fig. 1d, 4e, 5b, 6b-c, 7c-d, 7f, S2c, S4a-b, S4d) |
| <i>rad53-K227A</i> -H3K4A                    | CSY0187 | <i>MATa ura3-52 leu2-3,112 trp1 his3 Δ[HHT1-HHF1] Δ[HHT2-HHF2] kanMX4-rad53-K227A bar1::HIS3 natNT2-pMET25-3HA-LRE1 pMS337 [CEN4 ARS1 LEU2 hht1-H3K4A-HHF1]</i> | This study (Fig. 1d, 3a, 4f, 5b, 6b, S2c, S4a, S4c-d)         |
| <i>RAD53</i> -H3 (DNA Pol2-3xFLAG)           | CSY0489 | <i>MATa ura3-52 leu2-3,112 trp1 his3 Δ[HHT1-HHF1] Δ[HHT2-HHF2] POL2-3xFLAG-kanMX4 pMS337 [CEN4 ARS1 LEU2 HHT1-HHF1]</i>                                         | This study (Fig. 2, 3b, S3a)                                  |
| <i>RAD53</i> -H3K4A (DNA Pol2-3xFLAG)        | CSY0490 | <i>MATa ura3-52 leu2-3,112 trp1 his3 Δ[HHT1-HHF1] Δ[HHT2-HHF2] POL2-3xFLAG-kanMX4 pMS337 [CEN4 ARS1 LEU2 hht1-H3K4A-HHF1]</i>                                   | This study (Fig. 2, 3b, S3a)                                  |
| <i>rad53-K227A</i> -H3 (DNA Pol2-3xFLAG)     | CSY0491 | <i>MATa ura3-52 leu2-3,112 trp1 his3 Δ[HHT1-HHF1] Δ[HHT2-HHF2] natNT2-rad53-K227A POL2-3xFLAG-kanMX4 pMS337 [CEN4 ARS1 LEU2 HHT1-HHF1]</i>                      | This study (Fig. 2, 3b, S3a)                                  |
| <i>rad53-K227A</i> -H3K4A (DNA Pol2-3xFLAG)  | CSY0492 | <i>MATa ura3-52 leu2-3,112 trp1 his3 Δ[HHT1-HHF1] Δ[HHT2-HHF2] natNT2-rad53-K227A POL2-3xFLAG-kanMX4 pMS337 [CEN4 ARS1 LEU2 HHT1-H3K4A-HHF1]</i>                | This study (Fig. 2, 3b, S3a)                                  |
| <i>RAD53</i> -H3                             | CSY0095 | <i>MATa ura3-52 leu2-3,112 trp1 his3 Δ[HHT1-HHF1] Δ[HHT2-HHF2] bar1::HIS3 pMS337 [CEN4 ARS1 LEU2 HHT1-HHF1]</i>                                                 | This study (Fig. 3c-f, 4c, S4d)                               |
| <i>RAD53</i> -H3K4A                          | CSY0096 | <i>MATa ura3-52 leu2-3,112 trp1 his3 Δ[HHT1-HHF1] Δ[HHT2-HHF2] bar1::HIS3 pMS337 [CEN4 ARS1 LEU2 hht1-H3K4A-HHF1]</i>                                           | This study (Fig. 3c-f, 4c, S4d)                               |
| <i>rad53-K227A</i> -H3                       | CSY0101 | <i>MATa ura3-52 leu2-3,112 trp1 his3 Δ[HHT1-HHF1] Δ[HHT2-HHF2] natNT2-rad53-K227A bar1::HIS3 pMS337 [CEN4 ARS1 LEU2 HHT1-HHF1]</i>                              | This study (Fig. 3c-f, 4c, S4d)                               |
| <i>rad53-K227A</i> -H3K4A                    | CSY0102 | <i>MATa ura3-52 leu2-3,112 trp1 his3 Δ[HHT1-HHF1] Δ[HHT2-HHF2] natNT2-rad53-K227A bar1::HIS3 pMS337 [CEN4 ARS1 LEU2 HHT1-H3K4A-HHF1]</i>                        | This study (Fig. 3c-f, 4c, S4d)                               |
| <i>rad53-K227A HO-pMET25-3HA-LRE1</i> -H3    | CSY0457 | <i>MATa ura3-52 leu2-3,112 trp1 his3 Δ[HHT1-HHF1] Δ[HHT2-HHF2] natNT2-rad53-K227A bar1::HIS3 HO-pMET25-3HA-LRE1 pMS337 [CEN4 ARS1 LEU2 HHT1-HHF1]</i>           | This study (Fig. 4g)                                          |
| <i>rad53-K227A HO-pMET25-3HA-LRE1</i> -H3K4A | CSY0458 | <i>MATa ura3-52 leu2-3,112 trp1 his3 Δ[HHT1-HHF1] Δ[HHT2-HHF2] natNT2-rad53-K227A bar1::HIS3 HO-pMET25-3HA-LRE1 pMS337 [CEN4 ARS1 LEU2 hht1-H3K4A-HHF1]</i>     | This study (Fig. 4g)                                          |
| <i>rad53-K227A CD-pMET25-3HA-LRE1</i> -H3    | CSY0459 | <i>MATa ura3-52 leu2-3,112 trp1 his3 Δ[HHT1-HHF1] Δ[HHT2-HHF2] natNT2-rad53-K227A bar1::HIS3 CD-pMET25-3HA-LRE1 pMS337 [CEN4 ARS1 LEU2 HHT1-HHF1]</i>           | This study (Fig. 4g)                                          |
| <i>rad53-K227A CD-pMET25-3HA-LRE1</i> -H3K4A | CSY0460 | <i>MATa ura3-52 leu2-3,112 trp1 his3 Δ[HHT1-HHF1] Δ[HHT2-HHF2] natNT2-rad53-K227A bar1::HIS3 CD-pMET25-3HA-LRE1 pMS337 [CEN4 ARS1 LEU2 hht1-H3K4A-HHF1]</i>     | This study (Fig. 4g)                                          |
| <i>jhd2Δ</i> -H3                             | CSY0256 | <i>MATa ura3-52 leu2-3,112 trp1 his3 Δ[HHT1-HHF1] Δ[HHT2-HHF2] bar1::HIS3 natNT2-pMET25-3HA-LRE1 jhd2::HPH pMS337 [CEN4 ARS1 LEU2 HHT1-HHF1]</i>                | This study (5b-c)                                             |
| <i>jhd2Δ</i> -H3K4A                          | CSY0257 | <i>MATa ura3-52 leu2-3,112 trp1 his3 Δ[HHT1-HHF1] Δ[HHT2-HHF2] bar1::HIS3 natNT2-pMET25-3HA-LRE1 jhd2::HPH pMS337 [CEN4 ARS1 LEU2 hht1-H3K4A-HHF1]</i>          | This study (5b)                                               |

|                                      |         |                                                                                                                                                                                  |                            |
|--------------------------------------|---------|----------------------------------------------------------------------------------------------------------------------------------------------------------------------------------|----------------------------|
| <i>rad53-K227A jhd2Δ-H3</i>          | CSY0258 | <i>MATa ura3-52 leu2-3,112 trp1 his3 Δ[HHT1-HHF1] Δ[HHT2-HHF2] kanMX4-rad53-K227A bar1::HIS3 natNT2-pMET25-3HA-LRE1 jhd2::HPH pMS337 [CEN4 ARS1 LEU2 HHT1-HHF1]</i>              | This study (5b-f)          |
| <i>rad53-K227A jhd2Δ-H3K4A</i>       | CSY0259 | <i>MATa ura3-52 leu2-3,112 trp1 his3 Δ[HHT1-HHF1] Δ[HHT2-HHF2] kanMX4-rad53-K227A bar1::HIS3 natNT2-pMET25-3HA-LRE1 jhd2::HPH pMS337 [CEN4 ARS1 LEU2 hht1-H3K4A-HHF1]</i>        | This study (5b, 5d, 5f)    |
| <i>rad53-K227A-H3</i>                | CSY0416 | <i>MATa ura3-52 leu2-3,112 trp1 his3 Δ[HHT1-HHF1] Δ[HHT2-HHF2] natNT2-rad53-K227A bar1::HIS3 natNT2-pMET25-3HA-LRE1 pMS337 [CEN4 ARS1 LEU2 HHT1-HHF1]</i>                        | This study (Fig. 6b-c, 7d) |
| <i>rad53-K227A-H3K4A</i>             | CSY0417 | <i>MATa ura3-52 leu2-3,112 trp1 his3 Δ[HHT1-HHF1] Δ[HHT2-HHF2] natNT2-rad53-K227A bar1::HIS3 natNT2-pMET25-3HA-LRE1 pMS337 [CEN4 ARS1 LEU2 hht1-H3K4A-HHF1]</i>                  | This study (Fig. 6b-c, 7d) |
| <i>RAD53-H3K4R</i>                   | CSY0021 | <i>MATa ura3-52 leu2-3,112 trp1 his3 Δ[HHT1-HHF1] Δ[HHT2-HHF2] pMS337 [CEN4 ARS1 LEU2 hht1-H3K4R-HHF1]</i>                                                                       | This study (Fig. 7a)       |
| <i>RAD53 pTEF-CAN1-H3</i>            | CSY0545 | <i>MATa ura3-52 leu2-3,112 trp1 his3 Δ[HHT1-HHF1] Δ[HHT2-HHF2] bar1::HIS3 natNT2-pMET25-3HA-LRE1 kanMX4-pTEF-CAN1 pMS337 [CEN4 ARS1 LEU2 HHT1-HHF1]</i>                          | This study (Fig. 7c-f)     |
| <i>RAD53 pTEF-CAN1-H3K4A</i>         | CSY0546 | <i>MATa ura3-52 leu2-3,112 trp1 his3 Δ[HHT1-HHF1] Δ[HHT2-HHF2] bar1::HIS3 natNT2-pMET25-3HA-LRE1 kanMX4-pTEF-CAN1 pMS337 [CEN4 ARS1 LEU2 hht1-H3K4A-HHF1]</i>                    | This study (Fig. 7d-f)     |
| <i>rad53-K227A pTEF-CAN1-H3</i>      | CSY0547 | <i>MATa ura3-52 leu2-3,112 trp1 his3 Δ[HHT1-HHF1] Δ[HHT2-HHF2] natNT2-rad53-K227A bar1::HIS3 natNT2-pMET25-3HA-LRE1 kanMX4-pTEF-CAN1 pMS337 [CEN4 ARS1 LEU2 HHT1-HHF1]</i>       | This study (Fig. 7c-d)     |
| <i>rad53-K227A pTEF-CAN1-H3K4A</i>   | CSY0548 | <i>MATa ura3-52 leu2-3,112 trp1 his3 Δ[HHT1-HHF1] Δ[HHT2-HHF2] natNT2-rad53-K227A bar1::HIS3 natNT2-pMET25-3HA-LRE1 kanMX4-pTEF-CAN1 pMS337 [CEN4 ARS1 LEU2 hht1-H3K4A-HHF1]</i> | This study (Fig. 7d-e)     |
| <i>sml1Δ rad53-K227A-H3</i>          | CSY0112 | <i>MATa ura3-52 leu2-3,112 trp1 his3 Δ[HHT1-HHF1] Δ[HHT2-HHF2] natNT2-rad53-K227A sml1::HPH pMS337 [CEN4 ARS1 LEU2 HHT1-HHF1]</i>                                                | This study (Fig. S1b-c)    |
| <i>sml1Δ rad53-K227A-H3K4A</i>       | CSY0113 | <i>MATa ura3-52 leu2-3,112 trp1 his3 Δ[HHT1-HHF1] Δ[HHT2-HHF2] natNT2-rad53-K227A sml1::HPH pMS337 [CEN4 ARS1 LEU2 hht1-H3K4A-HHF1]</i>                                          | This study (Fig. S1b-c)    |
| <i>sml1Δ mec1Δ-H3</i>                | CSY0463 | <i>MATa ura3-52 leu2-3,112 trp1 his3 Δ[HHT1-HHF1] Δ[HHT2-HHF2] sml1::HPH mec1::kanMX4 pMS337 [CEN4 ARS1 LEU2 HHT1-HHF1]</i>                                                      | This study (Fig. S1b)      |
| <i>sml1Δ mec1Δ-H3K4A</i>             | CSY0464 | <i>MATa ura3-52 leu2-3,112 trp1 his3 Δ[HHT1-HHF1] Δ[HHT2-HHF2] sml1::HPH mec1::kanMX4 pMS337 [CEN4 ARS1 LEU2 hht1-H3K4A-HHF1]</i>                                                | This study (Fig. S1b)      |
| <i>sml1Δ mec1Δ rad53-K227A-H3</i>    | CSY0465 | <i>MATa ura3-52 leu2-3,112 trp1 his3 Δ[HHT1-HHF1] Δ[HHT2-HHF2] natNT2-rad53-K227A sml1::HPH mec1::kanMX4 pMS337 [CEN4 ARS1 LEU2 HHT1-HHF1]</i>                                   | This study (Fig. S1b)      |
| <i>sml1Δ mec1Δ rad53-K227A-H3K4A</i> | CSY0466 | <i>MATa ura3-52 leu2-3,112 trp1 his3 Δ[HHT1-HHF1] Δ[HHT2-HHF2] natNT2-rad53-K227A sml1::HPH mec1::kanMX4 pMS337 [CEN4 ARS1 LEU2 hht1-H3K4A-HHF1]</i>                             | This study (Fig. S1b)      |
| <i>sml1Δ rad53Δ-H3</i>               | CSY0116 | <i>MATa ura3-52 leu2-3,112 trp1 his3 Δ[HHT1-HHF1] Δ[HHT2-HHF2] sml1::HPH rad53::HIS5 pMS337 [CEN4 ARS1 LEU2 HHT1-HHF1]</i>                                                       | This study (Fig. S1c)      |
| <i>sml1Δ rad53Δ-H3K4A</i>            | CSY0117 | <i>MATa ura3-52 leu2-3,112 trp1 his3 Δ[HHT1-HHF1] Δ[HHT2-HHF2] sml1::HPH rad53::HIS5 pMS337 [CEN4 ARS1 LEU2 hht1-H3K4A-HHF1]</i>                                                 | This study (Fig. S1c)      |



|                                        |         |                                                                                                                                                         |                                  |
|----------------------------------------|---------|---------------------------------------------------------------------------------------------------------------------------------------------------------|----------------------------------|
| WT                                     | CSY0001 | <i>MATa ade2-1 ura3-1 his3-11,15 trp1-1 leu2-3,112 can1-100</i>                                                                                         | W303, This study (Fig. S1d, S2b) |
| <i>set1Δ</i>                           | CSY0002 | <i>MATa ade2-1 ura3-1 his3-11,15 trp1-1 leu2-3,112 can1-100 set1::kanMX4</i>                                                                            | This study (Fig. S1d)            |
| <i>rad53-11</i>                        | CSY0003 | <i>MATa ade2-1 ura3-1 his3-11,15 trp1-1 leu2-3,112 can1-100 TRP1-rad53-11</i>                                                                           | This study (Fig. S1d)            |
| <i>rad53-K227A</i>                     | CSY0004 | <i>MATa ade2-1 ura3-1 his3-11,15 trp1-1 leu2-3,112 can1-100 natNT2-rad53-K227A</i>                                                                      | This study (Fig. S1d, S2b)       |
| <i>rad53-11 set1Δ</i>                  | CSY0005 | <i>MATa ade2-1 ura3-1 his3-11,15 trp1-1 leu2-3,112 can1-100 TRP1-rad53-11 set1::kanMX4</i>                                                              | This study (Fig. S1d)            |
| <i>rad53-K227A set1Δ</i>               | CSY0006 | <i>MATa ade2-1 ura3-1 his3-11,15 trp1-1 leu2-3,112 can1-100 atNT2-rad53-K227A set::kanMX4</i>                                                           | This study (Fig. S1d)            |
| <i>rnh1Δ-H3</i>                        | CSY0220 | <i>MATa ura3-52 leu2-3,112 trp1 his3 Δ[HHT1-HHF1] Δ[HHT2-HHF2] rnh1::kanMX4 pMS337 [CEN4 ARS1 LEU2 HHT1-HHF1]</i>                                       | This study (Fig. S2a)            |
| <i>rnh201Δ-H3</i>                      | CSY0221 | <i>MATa ura3-52 leu2-3,112 trp1 his3 Δ[HHT1-HHF1] Δ[HHT2-HHF2] rnh201::kanMX4 pMS337 [CEN4 ARS1 LEU2 HHT1-HHF1]</i>                                     | This study (Fig. S2a)            |
| <i>rnh1Δ rnh201Δ-H3</i>                | CSY0222 | <i>MATa ura3-52 leu2-3,112 trp1 his3 Δ[HHT1-HHF1] Δ[HHT2-HHF2] rnh1::kanMX4 rnh201::HIS5 pMS337 [CEN4 ARS1 LEU2 HHT1-HHF1]</i>                          | This study (Fig. S2a)            |
| <i>rad53-K227A rnh1Δ-H3</i>            | CSY0224 | <i>MATa ura3-52 leu2-3,112 trp1 his3 Δ[HHT1-HHF1] Δ[HHT2-HHF2] natNT2-rad53-K227A rnh1::kanMX4 pMS337 [CEN4 ARS1 LEU2 HHT1-HHF1]</i>                    | This study (Fig. S2a)            |
| <i>rad53-K227A rnh201Δ-H3</i>          | CSY0225 | <i>MATa ura3-52 leu2-3,112 trp1 his3 Δ[HHT1-HHF1] Δ[HHT2-HHF2] natNT2-rad53-K227A rnh201::kanMX4 pMS337 [CEN4 ARS1 LEU2 HHT1-HHF1]</i>                  | This study (Fig. S2a)            |
| <i>rad53-K227A rnh1Δ rnh201Δ-H3</i>    | CSY0226 | <i>MATa ura3-52 leu2-3,112 trp1 his3 Δ[HHT1-HHF1] Δ[HHT2-HHF2] natNT2-rad53-K227A rnh1::kanMX4 rnh201::HIS5 pMS337 [CEN4 ARS1 LEU2 HHT1-HHF1]</i>       | This study (Fig. S2a)            |
| <i>rnh1Δ-H3K4A</i>                     | CSY0228 | <i>MATa ura3-52 leu2-3,112 trp1 his3 Δ[HHT1-HHF1] Δ[HHT2-HHF2] rnh1::kanMX4 pMS337 [CEN4 ARS1 LEU2 hht1-H3K4A-HHF1]</i>                                 | This study (Fig. S2a)            |
| <i>rnh201Δ-H3K4A</i>                   | CSY0229 | <i>MATa ura3-52 leu2-3,112 trp1 his3 Δ[HHT1-HHF1] Δ[HHT2-HHF2] rnh201::kanMX4 pMS337 [CEN4 ARS1 LEU2 hht1-H3K4A-HHF1]</i>                               | This study (Fig. S2a)            |
| <i>rnh1Δ rnh201Δ-H3K4A</i>             | CSY0230 | <i>MATa ura3-52 leu2-3,112 trp1 his3 Δ[HHT1-HHF1] Δ[HHT2-HHF2] rnh1::kanMX4 rnh201::HIS5 pMS337 [CEN4 ARS1 LEU2 hht1-H3K4A-HHF1]</i>                    | This study (Fig. S2a)            |
| <i>rad53-K227A rnh1Δ-H3K4A</i>         | CSY0232 | <i>MATa ura3-52 leu2-3,112 trp1 his3 Δ[HHT1-HHF1] Δ[HHT2-HHF2] natNT2-rad53-K227A rnh1::kanMX4 pMS337 [CEN4 ARS1 LEU2 hht1-H3K4A-HHF1]</i>              | This study (Fig. S2a)            |
| <i>rad53-K227A rnh201Δ-H3K4A</i>       | CSY0233 | <i>MATa ura3-52 leu2-3,112 trp1 his3 Δ[HHT1-HHF1] Δ[HHT2-HHF2] natNT2-rad53-K227A rnh201::kanMX4 pMS337 [CEN4 ARS1 LEU2 hht1-H3K4A-HHF1]</i>            | This study (Fig. S2a)            |
| <i>rad53-K227A rnh1Δ rnh201Δ-H3K4A</i> | CSY0234 | <i>MATa ura3-52 leu2-3,112 trp1 his3 Δ[HHT1-HHF1] Δ[HHT2-HHF2] natNT2-rad53-K227A rnh1::kanMX4 rnh201::HIS5 pMS337 [CEN4 ARS1 LEU2 hht1-H3K4A-HHF1]</i> | This study (Fig. S2a)            |
| <i>mlp1Δ</i>                           | CSY0572 | <i>MATa ade2-1 ura3-1 his3-11,15 trp1-1 leu2-3,112 can1-100 mlp1::kanMX4</i>                                                                            | This study (Fig. S2b)            |
| <i>sac3Δ</i>                           | CSY0573 | <i>MATa ade2-1 ura3-1 his3-11,15 trp1-1 leu2-3,112 can1-100 sac3::kanMX4</i>                                                                            | This study (Fig. S2b)            |
| <i>set1Δ</i>                           | CSY0049 | <i>MATa ade2-1 ura3-1 his3-11,15 trp1-1 leu2-3,112 can1-100 set1::HIS5</i>                                                                              | This study (Fig. S2b)            |
| <i>rad53-K227A set1Δ</i>               | CSY0050 | <i>MATa ade2-1 ura3-1 his3-11,15 trp1-1 leu2-3,112 can1-100 natNT2-rad53-K227A set1::HIS5</i>                                                           | This study (Fig. S2b)            |
| <i>rad53-K227A mlp1Δ</i>               | CSY0554 | <i>MATa ade2-1 ura3-1 his3-11,15 trp1-1 leu2-3,112 can1-100 natNT2-rad53-K227A mlp1::kanMX4</i>                                                         | This study (Fig. S2b)            |
| <i>rad53-K227A sac1Δ</i>               | CSY0555 | <i>MATa ade2-1 ura3-1 his3-11,15 trp1-1 leu2-3,112 can1-100 natNT2-rad53-K227A sac3::kanMX4</i>                                                         | This study (Fig. S2b)            |

|                                |         |                                                                                                                                                                           |                       |
|--------------------------------|---------|---------------------------------------------------------------------------------------------------------------------------------------------------------------------------|-----------------------|
| <i>rad53-K227A set1Δ mlp1Δ</i> | CSY0053 | <i>MATa ade2-1 ura3-1 his3-11,15 trp1-1 leu2-3,112 can1-100 natNT2-rad53-K227A set1::HIS5 mlp1::kanMX4</i>                                                                | This study (Fig. S2b) |
| <i>rad53-K227A set1Δ sac1Δ</i> | CSY0054 | <i>MATa ade2-1 ura3-1 his3-11,15 trp1-1 leu2-3,112 can1-100 natNT2-rad53-K227A set1::HIS5 sac3::kanMX4</i>                                                                | This study (Fig. S2b) |
| <i>rrm3Δ-H3</i>                | CSY0318 | <i>MATa ura3-52 leu2-3,112 trp1 his3 Δ[HHT1-HHF1] Δ[HHT2-HHF2] bar1::HIS3 natNT2-pMET25-3HA-LRE1 rrm3::HPH pMS337 [CEN4 ARS1 LEU2 HHT1-HHF1]</i>                          | This study (Fig. S2c) |
| <i>rrm3Δ-H3K4A</i>             | CSY0319 | <i>MATa ura3-52 leu2-3,112 trp1 his3 Δ[HHT1-HHF1] Δ[HHT2-HHF2] bar1::HIS3 natNT2-pMET25-3HA-LRE1 rrm3::HPH pMS337 [CEN4 ARS1 LEU2 HHT1-HHF1]</i>                          | This study (Fig. S2c) |
| <i>rad53-K227A rrm3Δ-H3</i>    | CSY0320 | <i>MATa ura3-52 leu2-3,112 trp1 his3 Δ[HHT1-HHF1] Δ[HHT2-HHF2] kanMX4-rad53-K227A bar1::HIS3 natNT2-pMET25-3HA-LRE1 rrm3::HPH pMS337 [CEN4 ARS1 LEU2 HHT1-HHF1]</i>       | This study (Fig. S2c) |
| <i>rad53-K227A rrm3Δ-H3K4A</i> | CSY0321 | <i>MATa ura3-52 leu2-3,112 trp1 his3 Δ[HHT1-HHF1] Δ[HHT2-HHF2] kanMX4-rad53-K227A bar1::HIS3 natNT2-pMET25-3HA-LRE1 rrm3::HPH pMS337 [CEN4 ARS1 LEU2 hht1-H3K4A-HHF1]</i> | This study (Fig. S2c) |

Supplementary Table 2: Primers used in this study

| Experiments        | Genes/regions                            | Sequences (5' - 3')                                                                                                                                                 | Reference/source/note(s)                                                                                                                                                        |
|--------------------|------------------------------------------|---------------------------------------------------------------------------------------------------------------------------------------------------------------------|---------------------------------------------------------------------------------------------------------------------------------------------------------------------------------|
| Yeast construction | <i>pMET25-3HA-LRE1</i>                   | (F) GAACCCTCGGCAATTATTTTCATACTCCTTCTCAGAA<br>TAGGAAAATGCGTACGCTGCAGGTCGAC<br>(R) CAGGATTTGGCTCTGATATTTGCACATGTTGAGTAT<br>GCGTATTCGGCATCGATGAATTCTCTGTCCG            | To amplify <i>kanMX4-pMET25-3HA</i> fragment from pYM-N36 <sup>2</sup> for yeast transformation                                                                                 |
|                    | <i>ire1:URA3</i>                         | (F) AACCCCTCGGCAATTATTTTCATACTCCTTCTCAGAAT<br>AGGAAAATGAGCAGATTGTACTGAGAGTGC<br>(R) CAATGCCGCTAAGGTTACGATTCACCTTTTTATTAC<br>TTATTATTAAGCTCTAATTTGTGAGTTTAG          | To amplify <i>Ire1::URA3</i> cassette from pRS406 for yeast transformation                                                                                                      |
|                    | <i>HO-pMET25-3HA-LRE1</i>                | (F) CTGAACCCTCGGCAATTATTTTCATACTCCTTCTCAG<br>AATAGGAAACTTAGCTCTCATTATTTTTGCTTTTTT<br>(R) CTCCAAGACTTACTGAAAAACCTGAA                                                 | To amplify marker-free <i>HO-pMET25-3HA-LRE1</i> fragment from CSTY0252                                                                                                         |
|                    | <i>CD-pMET25-3HA-LRE1</i>                | (F) CTGAACCCTCGGCAATTATTTTCATACTCCTTCTCAG<br>AATAGGAAACGTTAAGGTTACGATTCACCTTTTT<br>(R) TTTATTATTCTACTTTTATTATTAATAACTACATGC<br>AATCAATGCCTTAGCTCTCATTATTTTTGCTTTTTT | To amplify marker-free <i>CD-pMET25-3HA-LRE1</i> fragment from CSTY0252                                                                                                         |
|                    | <i>pTEF-CAN1</i>                         | (F) TTCTTAACCTCTGTAAAAACAAAAAAAAAAAAAGGC<br>ATAGCAATGCGTACGCTGCAGGTCGAC<br>(R) GTACATATGCTTCTCCTCTATGTCGGCGTCTTCTTT<br>TGAATTTGTCATCGATGAATTCTCTGTCCG               | To amplify <i>kanMX4-pTEF</i> fragment from pYM-N18 <sup>2</sup> for yeast transformation                                                                                       |
|                    | <i>kanMX_pRS</i>                         | (F) GGATCCCCGGGTTAATTAAGGCGCGCCAGATCTGT<br>TTAGTTCGGTGATGACGGTGAAAACCT<br>(R) TTTTCGACACTGGATGGCGGCGTTAGTATCGAATC<br>GACAGCCTGATTTAACAAAAATTTAACGCGA                | Universal primers for amplification of any markers from pRS plasmid series for replacing <i>kanMX4</i> cassette by indicated marker in any mutants from BY4741 deletion library |
|                    | <i>kanMX4_U2D2</i>                       | (F) CGTACGCTGCAGGTCGAC<br>(R) ATCGATGAATTCGAGCTCG                                                                                                                   | Universal primers for amplification of <i>kanmx4::Marker</i> fragment from maker-transformed BY4741 mutants                                                                     |
|                    | <i>BAR1</i>                              | (F) CGGTACACATTTGTTGCATTTATTA<br>(R) GTGATAGTTTAATGGTCAGAATGGG                                                                                                      | Gene knockout                                                                                                                                                                   |
|                    | <i>SET1</i>                              | (F) GGCAAAGAACAAGAAATACACAGT<br>(R) TGTTCTGTTTTTCAGGCATTT                                                                                                           |                                                                                                                                                                                 |
|                    | <i>BRE2</i>                              | (F) GCTAGGAAACTCCTGATCACATTTA<br>(R) TGGCATTTTTGAAATGTTATGTAATG                                                                                                     |                                                                                                                                                                                 |
|                    | <i>SPP1</i>                              | (F) GGCGATATTCGATAGACTTAACAGA<br>(R) TCTTCTGCAATATCTAAAGTGCTCA                                                                                                      |                                                                                                                                                                                 |
|                    | <i>JHD2</i>                              | (F) TCGTGATATAGAAGTAACGCATTGA<br>(R) CGATCGTGAATAAAAATGCTACTCT                                                                                                      |                                                                                                                                                                                 |
|                    | <i>MEC1</i>                              | (F).ATTCTTTTTCAAGGCTCCATAACTA<br>(R) TTTTCCATATCTTCGAGCTCTTCTA                                                                                                      |                                                                                                                                                                                 |
| <i>sml1_hphNT1</i> | (F) GGTCTCACTAACCTCTCTTCAACTGCTCAATAATTT |                                                                                                                                                                     |                                                                                                                                                                                 |

|                           |                                |                                                                                                                                                        |                                                                                                                                         |
|---------------------------|--------------------------------|--------------------------------------------------------------------------------------------------------------------------------------------------------|-----------------------------------------------------------------------------------------------------------------------------------------|
|                           |                                | CCCGCTATGCGTAC GCTGCAGGTCGAC<br>(R) GTGGGAAATGGAAAGAGAAAAGAAAAGAGTATGAA<br>GGAACITTAATCGATGAATTCGAGCTCG                                                |                                                                                                                                         |
|                           | <i>rad53_pUG73<sup>3</sup></i> | (F) AGAATAGTGAGAAAAGATAGTGTACACAACATCAA<br>CTAAAAATGCAGCTGAAGCTTCGTACGC<br>(R) TCTTAAAAAGGGGCAGCATTTTCTATGGGTATTTGT<br>CCTTGGTTAGCATAGGCCACTAGTGGATCTG |                                                                                                                                         |
|                           | <i>RNH1</i>                    | (F) CATGTATAAAGCACACTGCACCTAC<br>(R) GATGAAAAACTCGAAGAAATTGAAA                                                                                         |                                                                                                                                         |
|                           | <i>RNH201</i>                  | (F) AATTGACAGGAAACAAAACACTGAGAC<br>(R) ACAAAGGCAGACATAGTACGCTAAT                                                                                       |                                                                                                                                         |
|                           | <i>MLP1</i>                    | (F) ATCTTTGTTTCCTTTTATTCTCTT<br>(R) GGAACACTAAGAAAATCTGTTTGGA                                                                                          |                                                                                                                                         |
|                           | <i>SAC3</i>                    | (F) AGAATTCGTGATTCAATGTTTATTAT<br>(R) AGCAGTTTATAACTTTTTGGCCTCT                                                                                        |                                                                                                                                         |
|                           | <i>RRM3</i>                    | (F) TATCTTCCCTTACCGATTTATTTT<br>(R) GGCTAGATCTCTTTTTTCTAGTTTCT                                                                                         |                                                                                                                                         |
|                           | <i>rad53-K227A</i>             |                                                                                                                                                        | Integration of <i>EcoRI</i> -linearized PCH8- <i>rad53-K227A</i> plasmid at the <i>RAD53</i> locus <sup>4</sup>                         |
| Site-directed mutagenesis | H3R2A                          | ACGCAAACAATGGCCGCAACAAAGCAAACAGCA                                                                                                                      | To generate H3 mutant plasmids (pMS337) by PCR mutagenesis <sup>1</sup> . Underlined codons represent mutagenesis in indicated plasmids |
|                           | H3K4A                          | ACAATGGCCAGAACAG <u>CGC</u> CAAACAGCAAGAAAG                                                                                                            |                                                                                                                                         |
|                           | H3K4R                          | ACAATGGCCAGAACAA <u>AGG</u> CAAACAGCAAGAAAG                                                                                                            |                                                                                                                                         |
|                           | H3K36A                         | TCTACCGGTGGTGGTTGCGAAGCCTCACAGATAT                                                                                                                     |                                                                                                                                         |
|                           | H3K79A                         | ATCGCTCAAGATTT <u>CGC</u> GACCGACTTGAGATTT                                                                                                             |                                                                                                                                         |
| Gene expression (qPCR)    | <i>pMET25-3HA-LRE1</i>         | (F) GCGGCTGAAAATTGTCTT<br>(R) TGTAGCGTATTGGCGATAATGT                                                                                                   | This study (Fig. 5d, S4a)                                                                                                               |
|                           | <i>SCR1</i>                    | (F) CGGCTAGACACGGATTG<br>(R) GAGGAAAGACGGTTGCCA                                                                                                        | This study (Fig. 5d)                                                                                                                    |
|                           | <i>ACT1</i>                    | (F) TCACGCCATTTTGAGAATCG<br>(R) TTCAGCAGTGGTGGAGAAAGAG                                                                                                 | This study (Fig.S4a)                                                                                                                    |
| ChIP-qPCR                 | <i>pMET25-3HA-LRE1</i> (P1)    | (F) TATTACCCCATCCATACTCTTGAA<br>(R) ATAGGGATAGCCCGCATAGTCAGGA                                                                                          | This study (Fig. 5e, S4c)                                                                                                               |
|                           | <i>pMET25-3HA-LRE1</i> (P2)    | (F) TTGAAGACAAGGCCTAGGTCATTT<br>(R) ACAATTGCCCTTATCTACCATAACC                                                                                          |                                                                                                                                         |
|                           | <i>pMET25-3HA-LRE1</i> (P3)    | (F) CATTAAATGCACAGTCCATGCCCTTT<br>(R) TGCATCGTCCGCTCTCGTAATAAC                                                                                         |                                                                                                                                         |
|                           | <i>CAN1</i> (P1)               | (F) ATGACAAATTCAAAAGAAGACGCCG<br>(R) TGAAGCTCCAACGTCGTGAAAGAGG                                                                                         | This study (Fig. 7c)                                                                                                                    |
|                           | <i>CAN1</i> (P2)               | (F) CTGGCGGCATGGATTAGTATTTTT<br>(R) GACCCAGAACTCGAATTCACCGTAA                                                                                          |                                                                                                                                         |
|                           | <i>CAN1</i> (P3)               | (F) CCTAAATTCCTGTCAAGGACCACCA<br>(R) CTCCATGTAAGCCAAAGCGCCAAAT                                                                                         |                                                                                                                                         |
|                           | <i>TEL06R</i> (TEL)            | (F) CGTGTGTAGTGATCCGAACTCAGT                                                                                                                           | This study (Fig. 7c, S4c)                                                                                                               |

|                                                  |                     |                                                                 |                                   |
|--------------------------------------------------|---------------------|-----------------------------------------------------------------|-----------------------------------|
|                                                  |                     | (R) GACCAGTCCTCATTTCATCAATAG                                    |                                   |
| 2D electrophoresis<br>(DNA fragments for probes) | ARS305              | (F) AGGTTTCAGTATTGAAAGTTGGTA<br>(R) ACTATTTACATTATCGTCCTGTCA    | This study (Fig 4c, 4e-f, 5f, 6c) |
|                                                  | ARS305 (HO/CD-LRE1) | (F) GCGGCTGAAAATTGTCCTT<br>(R) TTA CTTCTTGAAAAAATATGTCTA        | This study (Fig 4g)               |
|                                                  | ARS1211 (PDC1)      | (F) CAAATATCGTTTGAATATTTTTCCG<br>(R) TACTACTAATGCAGTTTCAGGGTTTT | This study (Fig 4h)               |
|                                                  | ARS305L             | (F) CATGAACTTTGTATCTGAATTTTTG<br>(R) ATCTAACTACAAACTGAAGCAGAAT  | This study (Fig 6c)               |
|                                                  | ARS305LL            | (F) GTAATAGCTGCTGATTGGTCAGAAT<br>(R) GAATCTTTCGTCTCGATAAACTTCA  |                                   |
|                                                  | ARS1211             | (F) CATGGATGTACAGTAGAAATTACAT<br>(R) TGATTTCTATAAATTGGATGTCGAT  |                                   |
|                                                  | ARS1211R            | (F) TTGAATAGAATCCGTCTCTGCATCA<br>(R) AGGGTGCAAATAACATGTATGAACT  |                                   |
|                                                  | ARS1211RR           | (F) CTTGTCGATTGTTGTCAGATTACAC<br>(R) TCGTATTGCAATTTTTGTTTGTCTA  |                                   |
|                                                  | ARS1212             | (F) AATAAGAAGGGAGAGGTGGTAGAGA<br>(R) TATATTGCTGTGATCTGAATCTGGA  |                                   |

## References

1. Recht J, *et al.* Histone chaperone Asf1 is required for histone H3 lysine 56 acetylation, a modification associated with S phase in mitosis and meiosis. *Proc Natl Acad Sci U S A* **103**, 6988-6993 (2006).
2. Janke C, *et al.* A versatile toolbox for PCR-based tagging of yeast genes: new fluorescent proteins, more markers and promoter substitution cassettes. *Yeast* **21**, 947-962 (2004).
3. Gueldener U, Heinisch J, Koehler GJ, Voss D, Hegemann JH. A second set of loxP marker cassettes for Cre-mediated multiple gene knockouts in budding yeast. *Nucleic Acids Res* **30**, (2002).
4. Pellicioli A, *et al.* Activation of Rad53 kinase in response to DNA damage and its effect in modulating phosphorylation of the lagging strand DNA polymerase. *Embo Journal* **18**, 6561-6572 (1999).
